# Supplementary material for: Diverse Terpenoids and Their Associated Antifungal Properties from Roots of Different Cultivars of Chrysanthemum Morifolium Ramat
Source: PubMed Central journal article supplement (PMC7248984; doi:10.3390/molecules25092083), 2020-04-29
Supplement: molecules-25-02083-s001.pdf [file molecules-25-02083-s001.pdf]

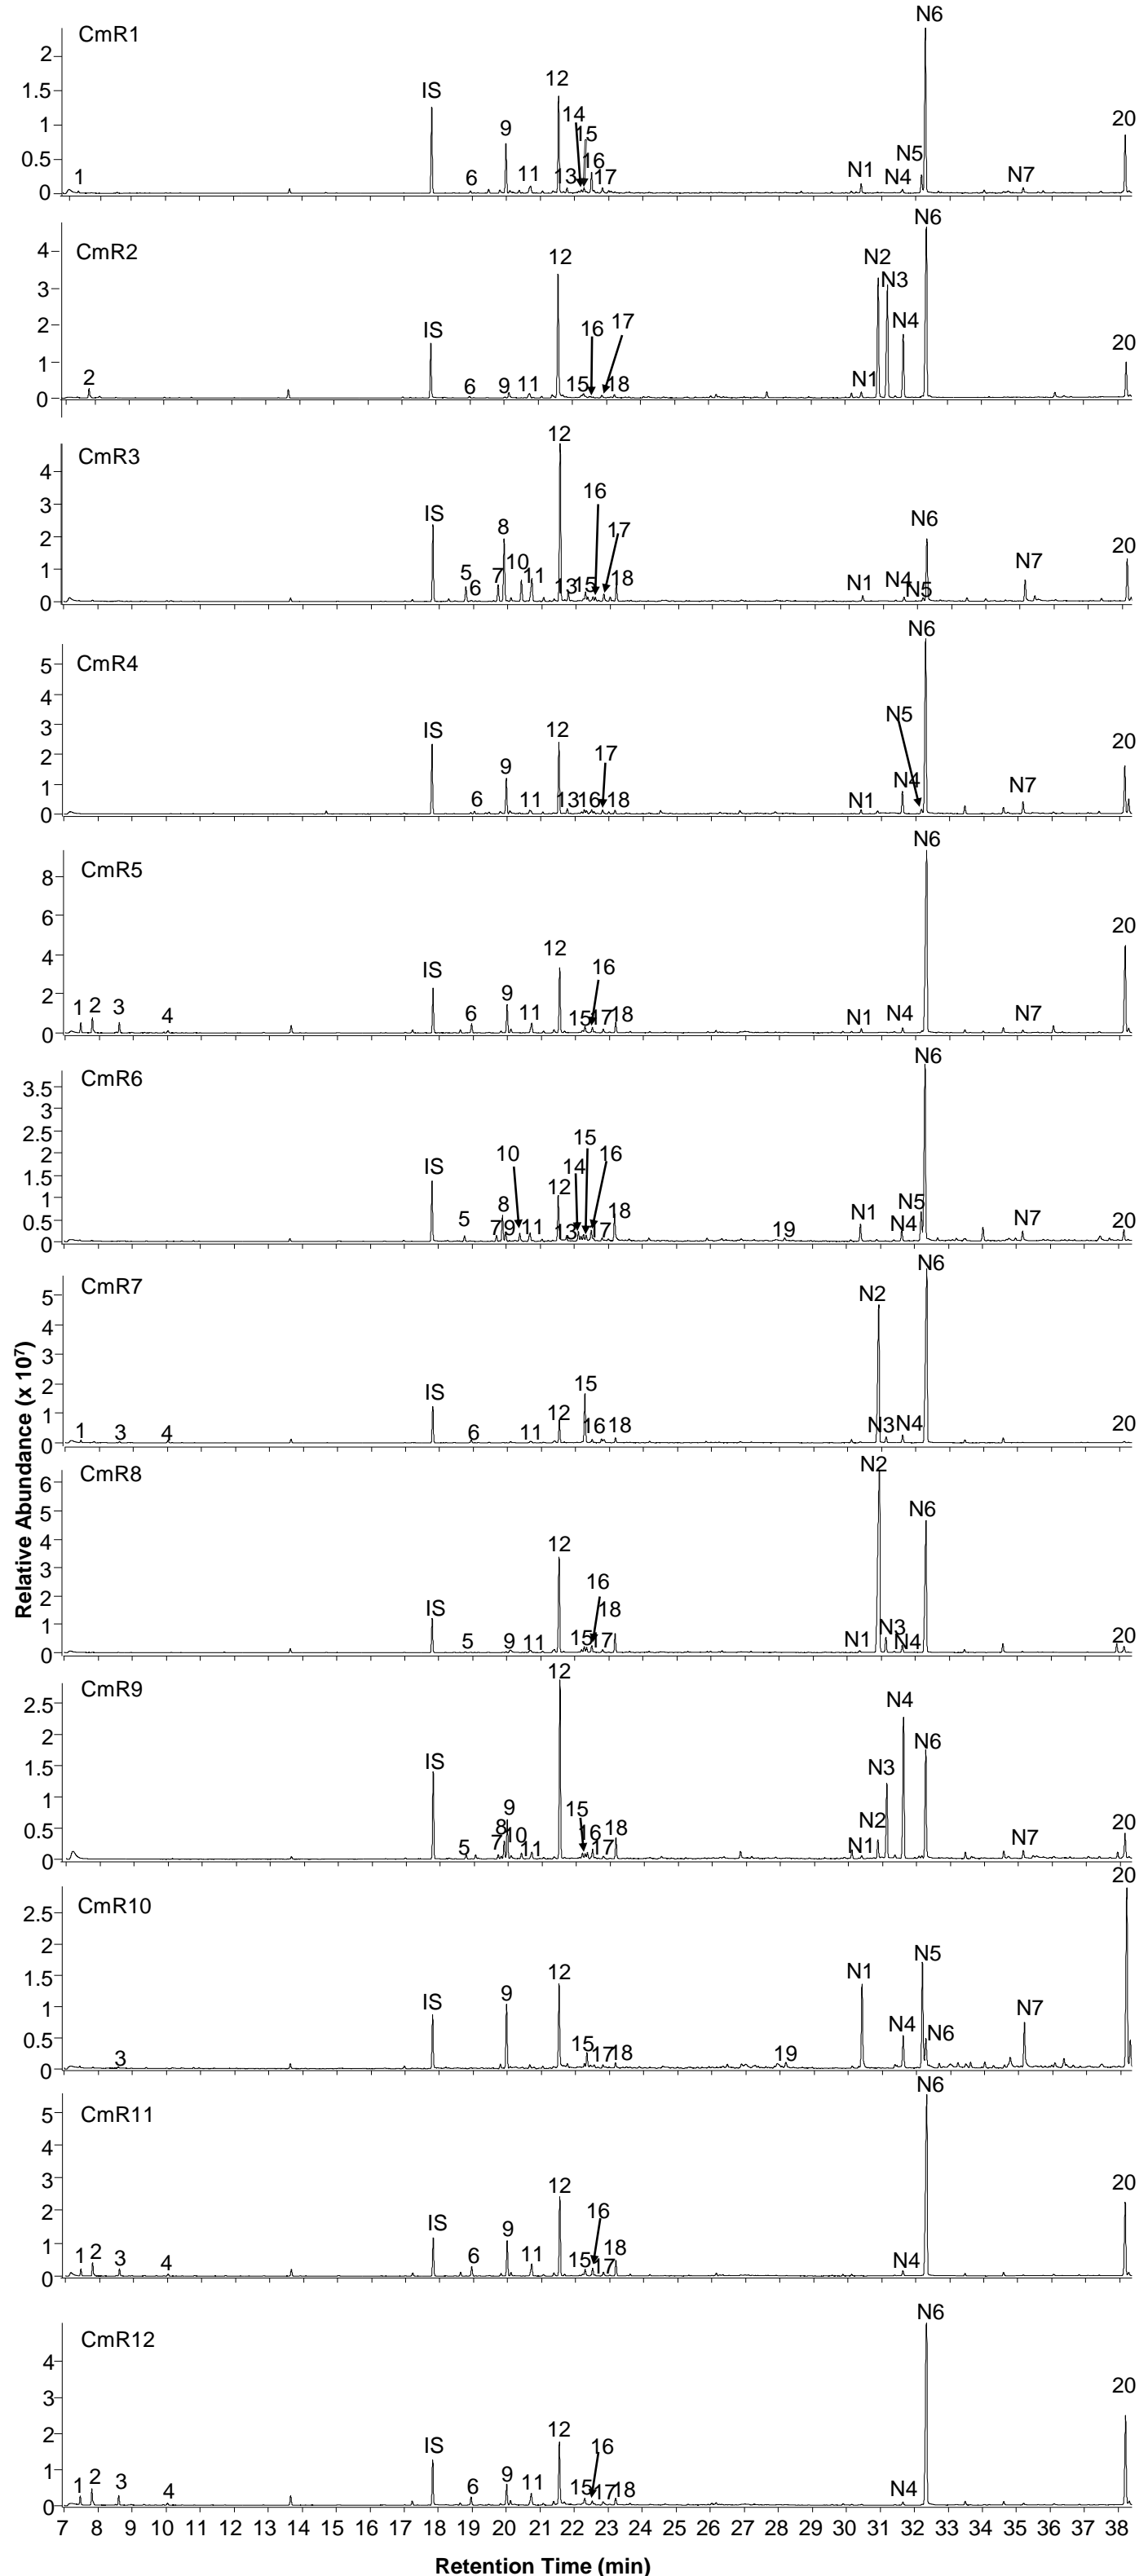

**Figure S1** The representative Chromatogram of CmR1-CmR12. The major terpenoids were labeled with 1-20. 1.  $\alpha$ -pinene, 2.  $\alpha$ -fenchene, 3.  $\beta$ -pinene, 4. para-cymene, 5. silphinene, 6.  $\alpha$ -longipinene, 7. modephene, 8.  $\alpha$ -isocomene, 9.  $\beta$ -elemene, 10.  $\beta$ -isocomene, 11. (E)- $\beta$ -caryophyllene, 12. (E)- $\beta$ -farnesene, 13.  $\beta$ -copaene, 14.  $\delta$ -bisabolene, 15. neollocimene, 16.  $\alpha$ -zingberene, 17.  $\beta$ -bisabolene, 18.  $\beta$ -sesquiphellandrene, 19.  $\gamma$ -Costol, 20. unidentified diterpene. N1-N7 represent the non-terpenoid compounds. N1. 3a,9b-Dimethyl-1,2,3a,4,5,9b-hexahydrocyclopenta[a]naphthalen-3-one, N2. 1,6-Dioxaspiro[4.4]non-3-ene, 2-(2,4-hexadiynylidene)- N3. (Z)-2-(Hexa-2,4-diyn-1-ylidene)-1,6-dioxaspiro[4.4]non-3-ene, N4. Azulen-2-ol, 1,4-dimethyl-7-(1-methylethyl)-, N5. Lovastatin, N6. (E)-2-(Hepta-2,4-diyn-1-ylidene)-1,6-dioxaspiro[4.4]non-3-ene, N7. 1-(4-(Isobutyryloxy)-3-methoxyphenyl)allyl 2-methylbutanoate

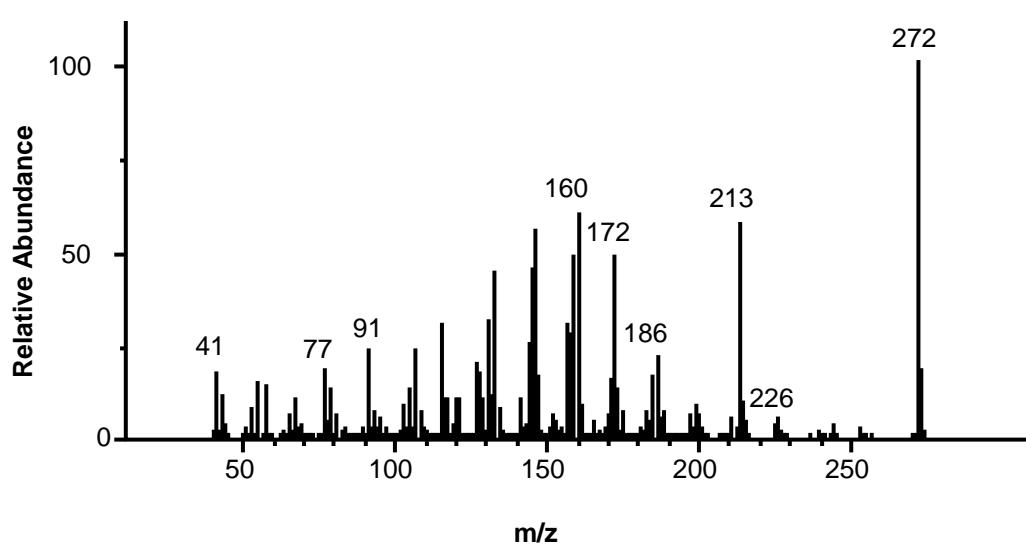

**Figure S2** Mass spectrum of the unidentified diterpene from the root extract in CmR5.
